# Supplementary material
Source: PubMed Central journal article supplement (PMC6734564)
Supplement: NIHMS1529239-supplement-1.pdf [file NIHMS1529239-supplement-1.pdf]

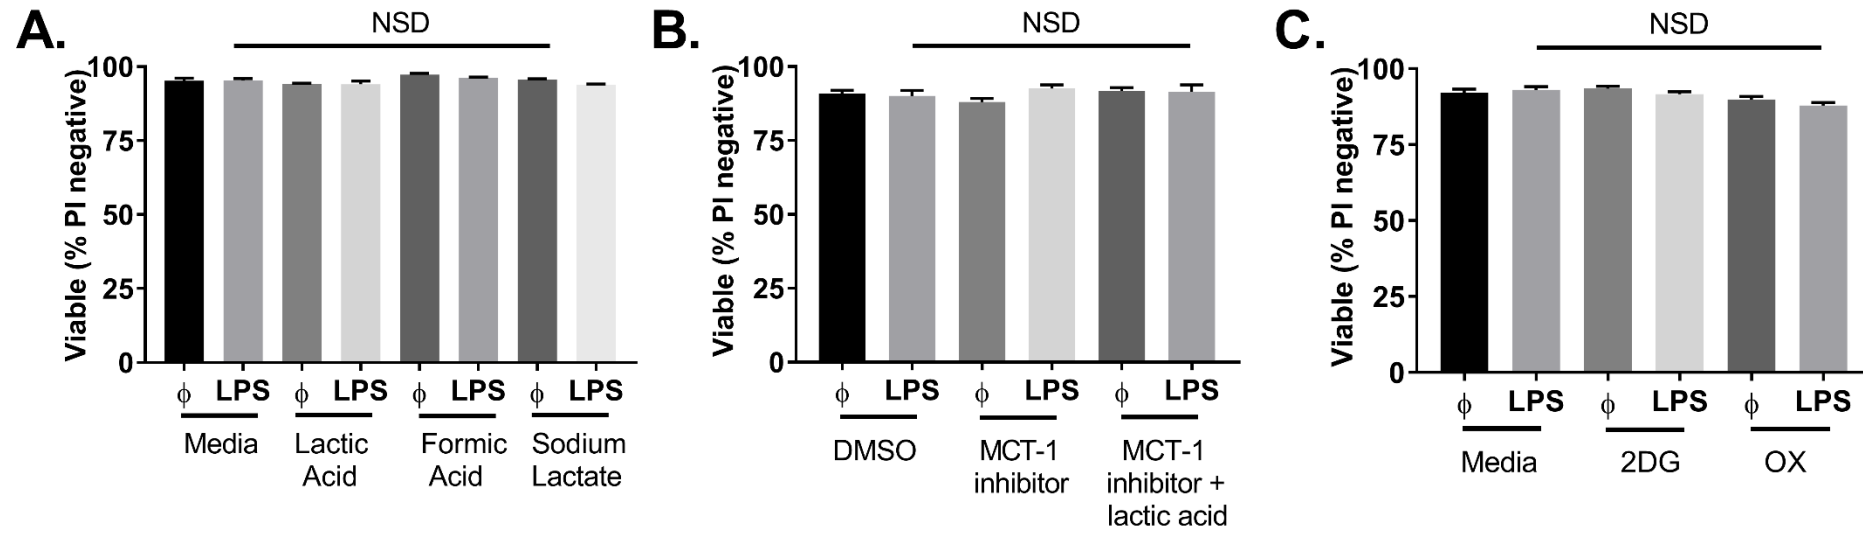

**Supplemental Figure 1: Cell viability is not changed with treatments used.** BMMC were treated A) for 24 hours with 12.5 mM lactic acid, formic acid, or sodium lactate, B) for 24 hours with DMSO or 100 nM AR-C155858, or C) for 1 hour 1 mM 2DG or 20 mM OX ± LPS (1 µg/mL) for 16 hours as in the corresponding experimental conditions. 10 µg/mL propidium iodide was then added for 1 min prior to flow cytometry analysis. Data are means ± SEM of 3 populations. NSD= No significant difference.

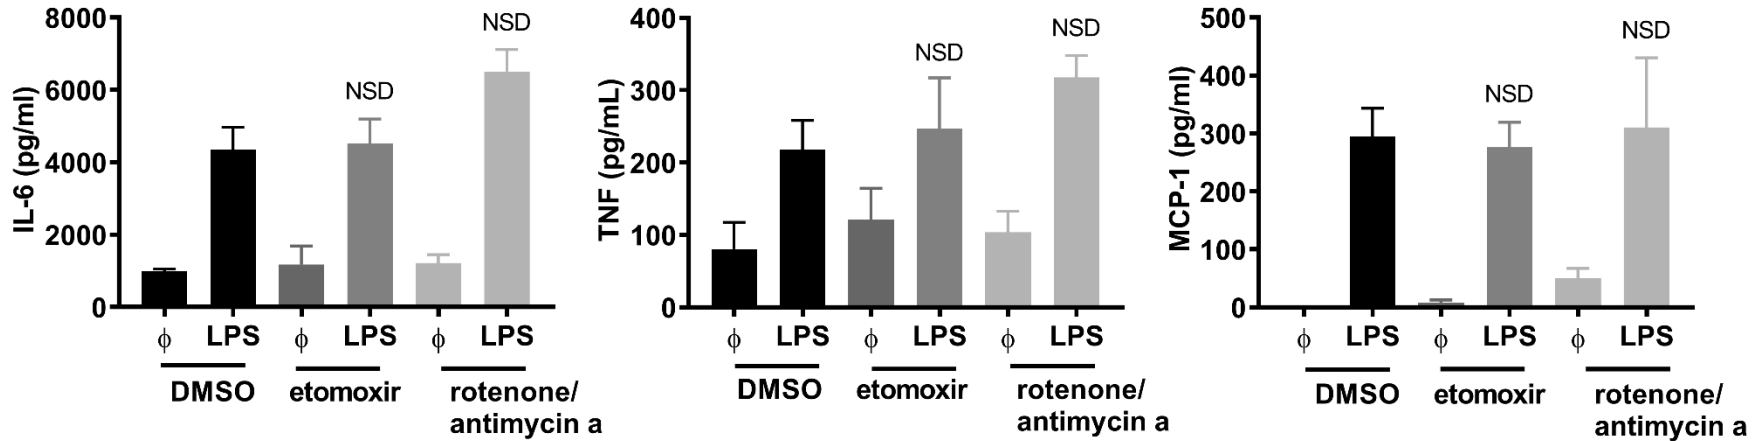

**Supplemental Figure 2: OX PHOS inhibitors have no effect on cytokine production.** BMMC were treated with DMSO (vehicle control), etomoxir (200 µM), or rotenone+antimycin A (1 µM) for 1 hour prior to LPS activation (1 µg/mL) for 16 hours. Cytokines were measured in supernatant by ELISA. Data are means ± SEM of 3 populations run in triplicate, representative of 3 independent experiments. NSD= no significant difference
